# Supplementary material
Source: PubMed Central journal article supplement (PMC6275683)
Supplement: 11658_2012_17_MOESM1_ESM.pdf [file 11658_2012_17_MOESM1_ESM.pdf]

Supplementary material

**PHYLOGENETIC ORIGIN AND TRANSCRIPTIONAL REGULATION  
AT THE POST-DIAUXIC PHASE OF *SPII* IN *Saccharomyces cerevisiae***

FERNANDO CARDONA<sup>1,2\*</sup>, MARCEL.LÍ DEL OLMO<sup>2</sup>  
and AGUSTÍN ARANDA<sup>1</sup>

<sup>1</sup>Departamento de Biotecnología, Instituto de Agroquímica y Tecnología  
de Alimentos, CSIC, Paterna, Spain, <sup>2</sup>Departament de Bioquímica i Biologia  
Molecular, Universitat de València, Burjassot, Spain

## Details of the phylogenetic analysis with MrBayes

```

input
outgroup XP503675_Y.lipolytica; outgroup XP001385034_P.stipitis; lset applyto=(all) rates=invgamma; unlink shape=(all) pinvar=(all);
prset ratepr=variable aamodelpr=mixed; mcmc ngen=1000000 nchains=4 printf=1000 samplefreq=1000 savebrlens=yes
sumt/sump burnin=700

```

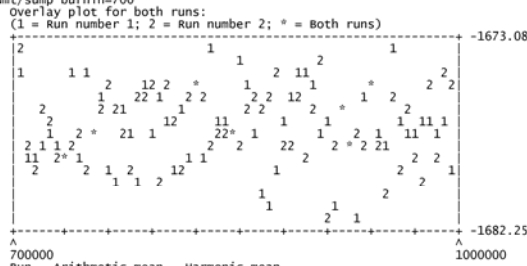

| Run   | Arithmetic mean | Harmonic mean |
|-------|-----------------|---------------|
| 1     | -1671.94        | -1687.88      |
| 2     | -1671.98        | -1687.64      |
| TOTAL | -1671.96        | -1687.77      |

| Parameter | Mean     | Variance  | 95% Cred. Interval |           | Median   | PSRF * |
|-----------|----------|-----------|--------------------|-----------|----------|--------|
|           |          |           | Lower              | Upper     |          |        |
| TL        | 4.555042 | 0.160492  | 3.798000           | 5.349000  | 4.544000 | 1.002  |
| alpha     | 5.060125 | 53.277599 | 1.671216           | 13.695501 | 3.785095 | 0.998  |
| pinvar    | 0.142337 | 0.002270  | 0.060436           | 0.242107  | 0.140259 | 0.999  |

Amino acid model probabilities:

| Model   | Posterior Probability | Standard Deviation |
|---------|-----------------------|--------------------|
| Poisson | 0.000                 | 0.000000           |
| Jones   | 0.000                 | 0.000000           |
| Dayhoff | 0.000                 | 0.000000           |
| Mtrev   | 0.000                 | 0.000000           |
| Mtmam   | 0.000                 | 0.000000           |
| wag     | 0.000                 | 0.000000           |
| Rtrev   | 0.000                 | 0.000000           |
| CpreV   | 0.000                 | 0.000000           |
| Vt      | 1.000                 | 0.000000           |
| Blosum  | 0.000                 | 0.000000           |

List of taxa in bipartitions:

```

1 -- XP390301_G.zeae
2 -- XP960686_N.crassa
3 -- XP368507_M.grisea
4 -- XP00155757_B.fuckeliana
5 -- XP001588389_S.sclerotiorum
6 -- XP503675_Y.lipolytica
7 -- XP001385034_P.stipitis
8 -- NP986804_A.gossypii
9 -- XP453996_K.lactis
10 -- NP011077_Sp11_S.cerevisiae
11 -- NP010362_Sed1_S.cerevisiae
12 -- XP710492_C.albicans
13 -- XP448661_C.glabrata
14 -- XP447538_C.glabrata

```

Summary statistics for taxon bipartitions:

| ID | Partition | #obs | Probab.  | Stdev(s) | Mean(v)  | Var(v)   | PSRF  | Nruns |
|----|-----------|------|----------|----------|----------|----------|-------|-------|
| 1  | ..**      | 602  | 1.000000 | 0.000000 | 0.363348 | 0.007403 | 0.999 | 2     |
| 2  | ..**      | 602  | 1.000000 | 0.000000 | 0.097996 | 0.002139 | 1.000 | 2     |
| 3  | ..**      | 602  | 1.000000 | 0.000000 | 0.077669 | 0.001656 | 0.998 | 2     |
| 4  | ..**      | 602  | 1.000000 | 0.000000 | 0.103415 | 0.001818 | 0.998 | 2     |
| 5  | ..**      | 602  | 1.000000 | 0.000000 | 0.076848 | 0.001057 | 0.998 | 2     |
| 6  | ..**      | 602  | 1.000000 | 0.000000 | 0.194025 | 0.004552 | 0.999 | 2     |
| 7  | ..**      | 602  | 1.000000 | 0.000000 | 0.255290 | 0.004225 | 0.998 | 2     |
| 8  | ..**      | 602  | 1.000000 | 0.000000 | 0.104863 | 0.001342 | 0.999 | 2     |
| 9  | ..**      | 602  | 1.000000 | 0.000000 | 0.505809 | 0.012382 | 0.998 | 2     |
| 10 | ..**      | 602  | 1.000000 | 0.000000 | 0.153262 | 0.003324 | 1.015 | 2     |
| 11 | ..**      | 602  | 1.000000 | 0.000000 | 0.344413 | 0.008404 | 0.998 | 2     |
| 12 | ..**      | 602  | 1.000000 | 0.000000 | 0.244985 | 0.005779 | 0.999 | 2     |
| 13 | ..**      | 602  | 1.000000 | 0.000000 | 0.071447 | 0.001689 | 1.001 | 2     |
| 14 | ..**      | 602  | 1.000000 | 0.000000 | 0.577952 | 0.014843 | 0.998 | 2     |
| 15 | ..**      | 602  | 1.000000 | 0.000000 | 0.171726 | 0.004546 | 0.999 | 2     |
| 16 | ..**      | 601  | 0.998339 | 0.002349 | 0.191443 | 0.004486 | 0.999 | 2     |
| 17 | ..**      | 598  | 0.993355 | 0.004698 | 0.169413 | 0.004070 | 0.999 | 2     |
| 18 | ..**      | 593  | 0.985050 | 0.002349 | 0.168874 | 0.005580 | 1.013 | 2     |
| 19 | ..**      | 580  | 0.963455 | 0.009397 | 0.132990 | 0.003340 | 0.999 | 2     |
| 20 | ..**      | 575  | 0.955150 | 0.007048 | 0.132262 | 0.003947 | 1.004 | 2     |
| 21 | ..**      | 572  | 0.950166 | 0.009397 | 0.137887 | 0.004417 | 1.000 | 2     |
| 22 | ..**      | 510  | 0.847176 | 0.018794 | 0.076813 | 0.001538 | 1.006 | 2     |
| 23 | ..**      | 446  | 0.740864 | 0.014095 | 0.098824 | 0.002728 | 1.002 | 2     |
| 24 | ..**      | 403  | 0.669435 | 0.025841 | 0.049331 | 0.001070 | 1.003 | 2     |
| 25 | ..**      | 295  | 0.490033 | 0.049333 | 0.092730 | 0.003673 | 0.999 | 2     |
| 26 | ..**      | 152  | 0.252492 | 0.014095 | 0.029488 | 0.000531 | 1.017 | 2     |
| 27 | ..**      | 135  | 0.224252 | 0.021143 | 0.063249 | 0.002274 | 1.003 | 2     |
| 28 | ..**      | 100  | 0.166113 | 0.004698 | 0.084661 | 0.002397 | 1.013 | 2     |
| 29 | ..**      | 84   | 0.139535 | 0.028190 | 0.069800 | 0.001666 | 1.001 | 2     |
| 30 | ..**      | 81   | 0.134551 | 0.007048 | 0.078874 | 0.002328 | 0.998 | 2     |
| 31 | ..**      | 80   | 0.132890 | 0.000000 | 0.046119 | 0.001359 | 1.014 | 2     |
| 32 | ..**      | 34   | 0.056478 | 0.009397 | 0.012753 | 0.000105 | 1.148 | 2     |

Credible sets of trees (105 trees sampled):

```

50 % credible set contains 5 trees
90 % credible set contains 45 trees
95 % credible set contains 75 trees
99 % credible set contains 99 trees

```

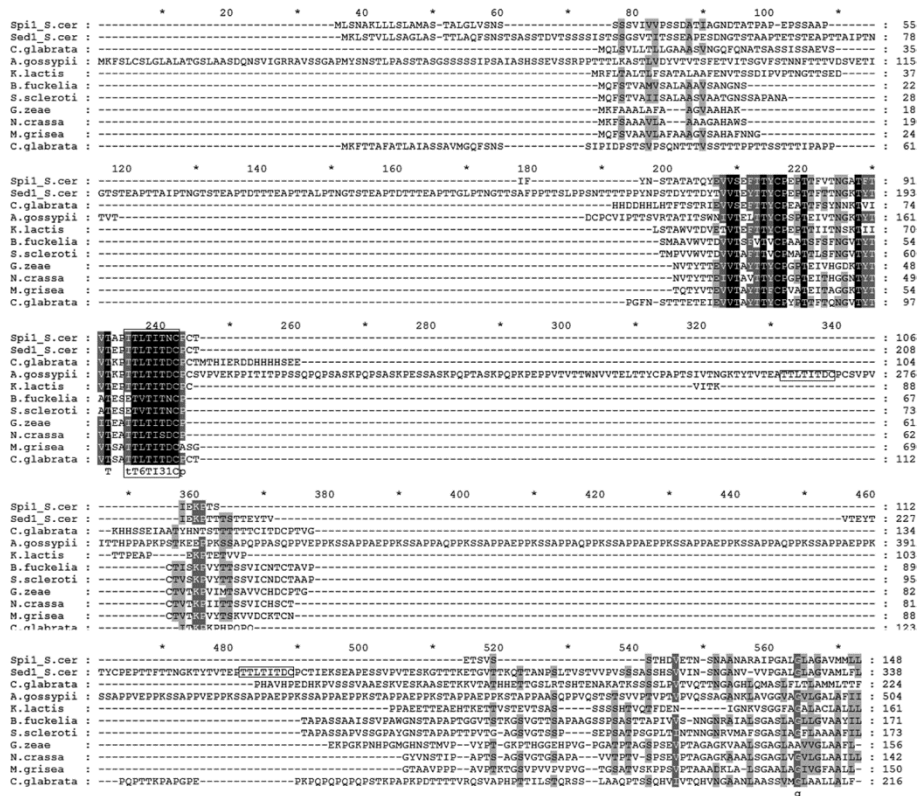

Suppl. Fig. 1. Unedited alignment of amino acid sequences used for the phylogenetic study. The alignment was made using ClustalX 2.0. The conserved motif repeated twice in *A. gossypii* protein and in Sed1p is squared.

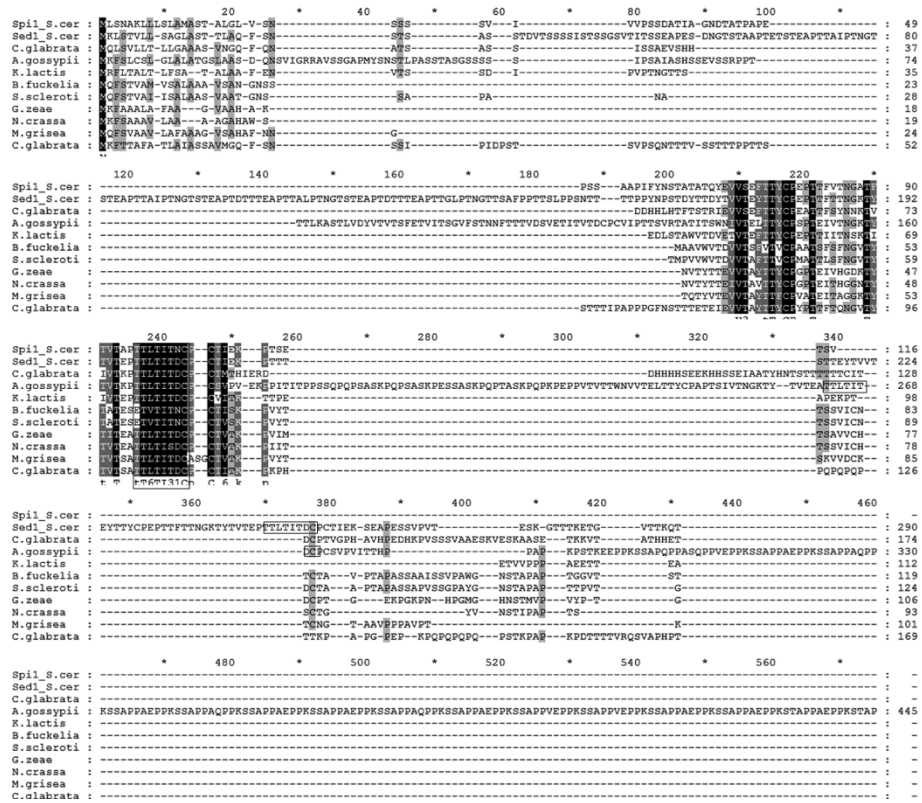

Suppl. Fig. 2. Unedited alignment of amino acid sequences using Probcons. The conserved motif is squared. Note that the results are similar to those obtained used with Clustal 2.0, at least for the sequence used for the phylogenetic analysis (Fig. 1).

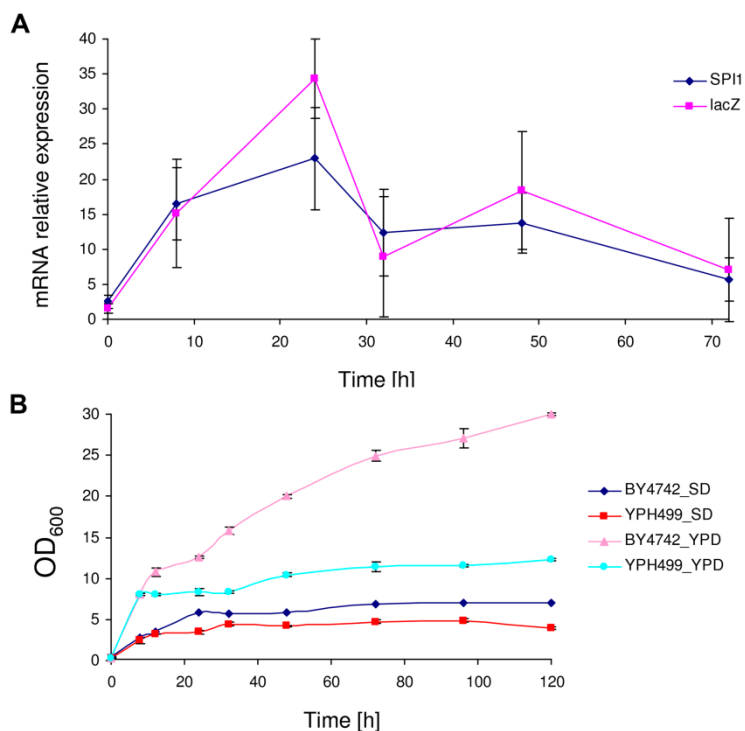

Suppl. Fig. 3. Comparison of *SPII* and reporter expression and effect of *S. cerevisiae* strain in growth. A – Comparison of mRNA expression by Northern blot of *SPII* and *lacZ* controlled by *SPII* promoter in the strain YPH499. B – Comparison of the growth (measured as optical density at 600 nm) of BY4742 and YPH499 strains in rich (YPD) and minimal media (SD). Strains and media are indicated in the legend. The curve is presented in semi-logarithmic scale.

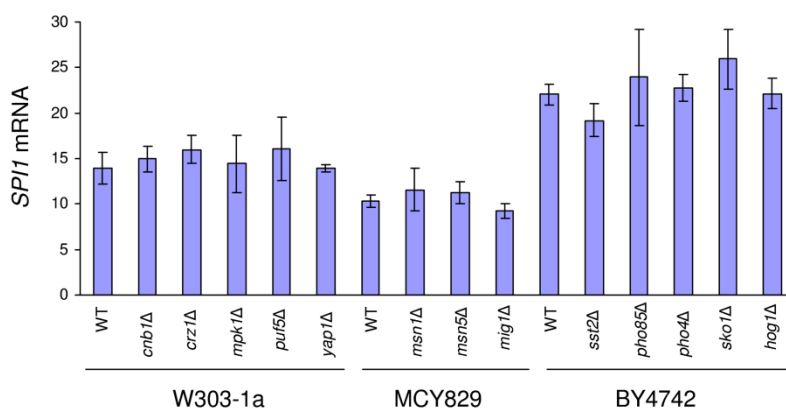

Suppl. Fig. 4. Mutant strains tested without effect in *SPII* induction in post-diauxic conditions. *SPII* expression analysed by Northern blot is shown after 8 h growing in YPD from  $OD_{600} = 0.3$ . The background strain of the mutants is shown at the bottom.

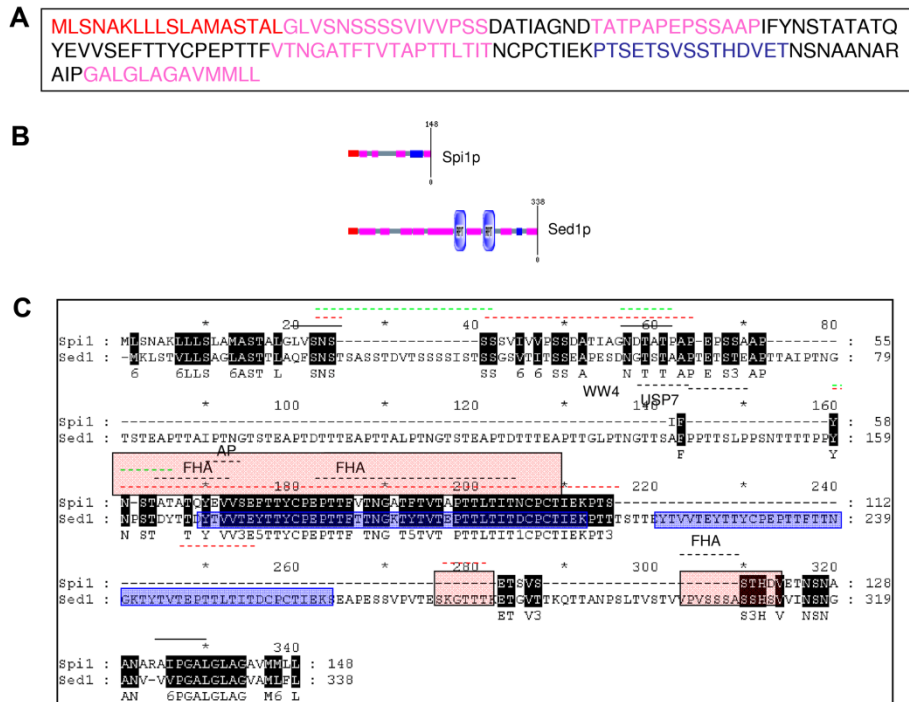

Suppl. Fig. 5. Motifs and domains present in Spi1p and Sed1p. A – Amino acid sequence of Spi1p and domains found by SMART. Domains are squared in the following colours: Red, signal peptide; pink, low complexity areas; blue, intrinsic disorder; RPT (blue), internal repeats. B – Distribution of domains found by SMART in Sed1p and Spi1p. The same colour code as in A) is used. C – Alignment of the amino acid sequence of Spi1p and its homologue Sed1p. Shown in pink is the serine-threonine rich domain, characteristic of these proteins and potential substrate of serine-threonine kinases. For Sed1p, shown in blue is the repeated domain, present only once in Spi1p (RPT in B). Also shown squared are the motifs recognized as domains (indicated by the name) or substrate of post-translational modifications. Black continuous: N-myristoylation; red dashed: phosphorylation; green dashed: N-glycosylation; FHA: phosphothreonine union; WW4: phosphorylation-dependent interaction domain; USP7: binding domain; AP: interaction with AP (adaptor protein, typical of the endocytic route, very common in membrane or cell wall proteins, especially those involved in transport).

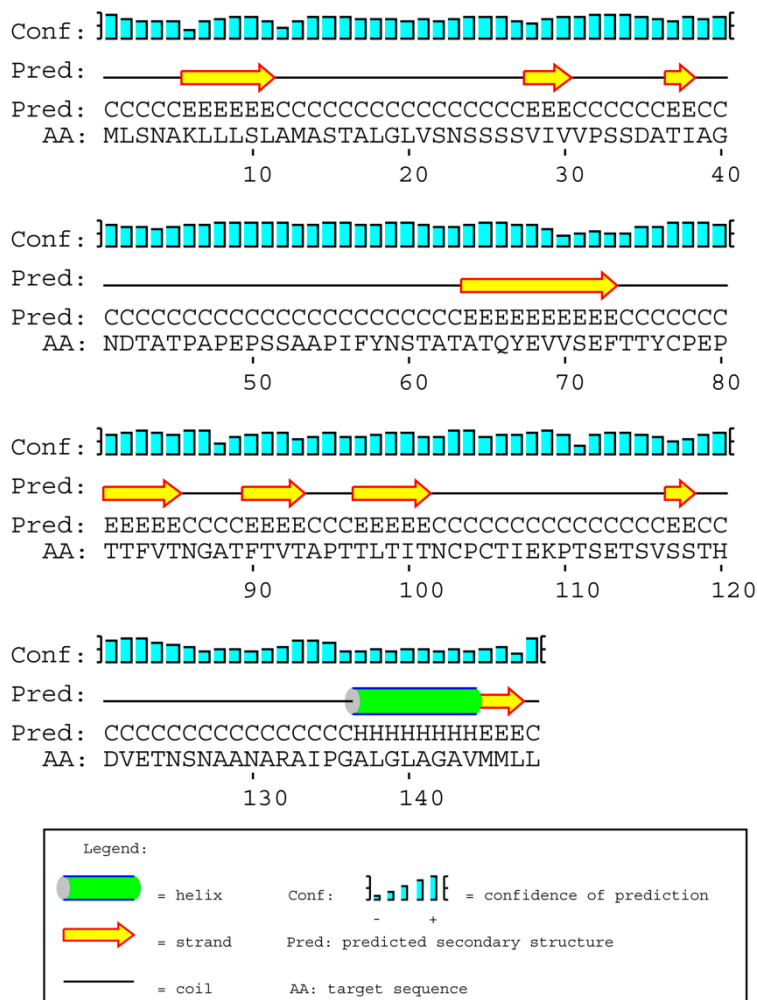

Suppl. Fig. 6. Secondary structure prediction of Spi1p.  $\alpha$ -helices are shown as green cylinders (H above the amino acid sequence) and  $\beta$ -sheets as yellow arrows (E above the amino acid sequence). The probability is shown as blue bars over the prediction. The results show that in Spi1p there are 9 putative regions adopting a  $\beta$ -sheet structure, four of them dubious due to their small size and/or their low probability. The first one corresponds to the signal peptide, the fourth includes one conserved region (VVSeFTTYCP; Fig. 1B, fifth and sixth are also within one conserved domain (TTFVT-TFTVT; Fig. 1B). The seventh is the most conserved (TTLTITNCP), and probably is important in the function of the protein. Probably these motifs, due to their evolutionary conservation, are part of the secondary structure and play a central role in the function of the protein. An  $\alpha$ -helix is also predicted at the C-terminus of the protein, although with low probability.

## Suppl. Table 1. Strains and plasmids used in this work.

A. *S. cerevisiae* strains used in this work.

| Strain                           | Genotype                                                | Reference                    |
|----------------------------------|---------------------------------------------------------|------------------------------|
| <i>W303-1a</i>                   | <i>MATa, ade 2-1, ura 3-1, leu 2-3, his 3-1, trp1-1</i> | [1]                          |
| <i>W303-1a</i>                   | <i>W303-1a msn2Δ3::HIS3, msn4-1::TRP1</i>               | [2]                          |
| <i>msn2Δmsn4Δ</i>                |                                                         |                              |
| <i>W303-1a cnb1Δ</i>             | <i>W303-1a, cnb1::LEU2</i>                              | [3]                          |
| <i>W303-1a crz1Δ</i>             | <i>W303-1a, crz1::G418</i>                              | [4]                          |
| <i>W303-1a mpk1Δ</i>             | <i>W303-1a mpk1::TRP1</i>                               | [5]                          |
| <i>W303-1a pkc1<sup>ts</sup></i> | <i>W303-1a pkc1<sup>ts</sup>-X</i>                      | [6]                          |
| <i>W303-1a puf5Δ</i>             | <i>W303-1a uth4::KanMX4</i>                             | P. Carrasco, doctoral thesis |
| <i>W303-1a yak1Δ</i>             | <i>W303-1a yak1::KanMX4</i>                             | P. Carrasco, doctoral thesis |
| <i>W303-1a yap1Δ</i>             | <i>W303-1a yap1::KanMX4</i>                             | F. Rández-Gil                |
| <i>MCY829</i>                    | <i>MATa his3-Δ200 lys2-801 ura3-52</i>                  | [7]                          |
| <i>MCY msn1Δ</i>                 | <i>MCY829 msn1-Δ1::URA3</i>                             | [7]                          |
| <i>MCY msn5Δ</i>                 | <i>MCY829 msn5-Δ2::HIS3</i>                             | [8]                          |
| <i>MCY mig1Δ</i>                 | <i>MCY829 leu2::HIS3 mig1-Δ2::LEU2</i>                  | [9]                          |
| <i>BY4741</i>                    | <i>MAT a, his3-1, leu2-0, met15-0, ura3-0</i>           | Euroscarf                    |
| <i>BY4741 pho84Δ</i>             | <i>BY4741 pho84::KanMX4</i>                             | Euroscarf                    |
| <i>BY4741 wsc2Δ</i>              | <i>BY4741 wsc2::KanMX4</i>                              | Euroscarf                    |
| <i>BY4742</i>                    | <i>MATα, his3-1, leu2-0, lys2-0, ura3-0</i>             | Euroscarf                    |
| <i>BY4742 hog1Δ</i>              | <i>BY4742 hog1::KanMX4</i>                              | Euroscarf                    |
| <i>BY4742 pho85Δ</i>             | <i>BY4742 pho85::KanMX4</i>                             | Euroscarf                    |
| <i>BY4742 pop2Δ</i>              | <i>BY4742 pop2::KanMX4</i>                              | Euroscarf                    |
| <i>BY4742 pho4Δ</i>              | <i>BY4742 pho4::KanMX4</i>                              | Euroscarf                    |
| <i>BY4742 sko1Δ</i>              | <i>BY4742 sko1::KanMX4</i>                              | Euroscarf                    |
| <i>BY4742 sst2Δ</i>              | <i>BY4742 sst2::KanMX4</i>                              | Euroscarf                    |
| <i>MLY40</i>                     | <i>MATα, ura 3-52</i>                                   | [10]                         |
| <i>MLY40 phd1Δ</i>               | <i>MLY40 phd1::G418</i>                                 | [10]                         |
| <i>MLY40 sok2Δ</i>               | <i>MLY40 sok2::hygB</i>                                 | [10]                         |

## B. Plasmids used in this work.

| Plasmid                  | Description                                                                                              | Reference |
|--------------------------|----------------------------------------------------------------------------------------------------------|-----------|
| <i>YEp352</i>            | Multicopy shuttle vector. <i>URA3</i> marker                                                             | [11]      |
| <i>YEp352-PKC1</i>       | Multicopy shuttle vector. <i>URA3</i> marker. <i>PKC1</i> in <i>PstI/BglIII</i> .                        | [12]      |
| <i>YEp352-MPK1</i>       | Multicopy shuttle vector. <i>URA3</i> marker. <i>MPK1</i> in <i>SphI/NcoI</i> .                          | [12]      |
| <i>YEp357</i>            | Multicopy shuttle vector. <i>URA3</i> marker. <i>lacZ</i> .                                              | [13]      |
| <i>YEp357-SPIIp/lacZ</i> | Multicopy shuttle vector. <i>URA3</i> marker. <i>lacZ</i> expression controlled by <i>SPII</i> promoter. | [14]      |



Suppl. Table 2. Transcription factors regulating *SP11* expression.

A. Analysis of transcription factors (TF), using YEASTRACT tool (<http://www.yeasttract.com/>), which regulate *SP11* expression documented by direct or indirect evidence. Abbreviations: Northern blot (NB); expression microarrays (ARR); chromatin immunoprecipitation (ChIP); ChIP-on-CHIP (ChIP-CH), mutant (mt), wild-type (WT).

| TF          | Reference | Evidence                   |
|-------------|-----------|----------------------------|
| Adr1p       | [15]      | Indirect: ARR (WT/TFmt)    |
| Aft1p       | [16]      | Indirect: ARR (WT/TFmt)    |
| Cat8p       | [15]      | Indirect: ARR (WT/TFmt)    |
| Cin5p       | [17]      | Direct: ChIP               |
| Crz1p       | [15]      | Indirect: ARR (WT/TFmt)    |
|             | [18]      | Indirect: ARR (WT/TFmt)    |
| Cst6p       | [15]      | Indirect: ARR (WT/TFmt)    |
| Gat4p       | [15]      | Indirect: ARR (WT/TFmt)    |
| Gcr2p       | [19]      | Indirect: ARR (WT/TFmt)    |
| Gis1p       | [15]      | Indirect: ARR (WT/TFmt)    |
| Gzf3p       | [15]      | Indirect: ARR (WT/TFmt)    |
| Haa1p       | [20]      | Indirect: NB (WT/TFmt)     |
| Hap4p       | [21]      | Indirect: ARR (WT/TFmt)    |
| Hot1p       | [22]      | Direct: ChIP               |
| Hsf1p       | [15]      | Indirect: ARR (WT/TFmt)    |
|             | [23]      | Indirect: RT-PCR (WT/TFmt) |
|             | [24]      | Indirect: RT-PCR (WT/TFmt) |
|             | [25]      | Indirect: RT-PCR (WT/TFmt) |
| Ino2p       | [26]      | Indirect: ARR (WT/TFmt)    |
| Ino4p       | [26]      | Indirect: ARR (WT/TFmt)    |
| Mbp1p       | [15]      | Indirect: ARR (WT/TFmt)    |
| Mcm1p       | [27]      | Indirect: NB (WT/TFmt)     |
| Met31p      | [15]      | Indirect: ARR (WT/TFmt)    |
| Met4p       | [28]      | Indirect: ARR (WT/TFmt)    |
| Mga1p       | [15]      | Indirect: ARR (WT/TFmt)    |
| Mig1p       | [15]      | Indirect: ARR (WT/TFmt)    |
| Msn2p/Msn4p | [15]      | Indirect: ARR (WT/TFmt)    |
|             | [29]      | Indirect: ARR (WT/TFmt)    |
|             | [30]      | Indirect: NB (WT/TFmt)     |
|             | [31]      | Indirect: NB (WT/TFmt)     |
|             | [32]      | Indirect: NB (WT/TFmt)     |
| Pdr3p       | [33]      | Indirect: ARR (WT/TFmt)    |
| Put3p       | [15]      | Indirect: ARR (WT/TFmt)    |
| Rds2p       | [34]      | Direct: ChIP-CH            |
| Rfx1p       | [15]      | Indirect: ARR (WT/TFmt)    |
| Rgm1p       | [15]      | Indirect: ARR (WT/TFmt)    |

| TF     | Reference | Evidence                |
|--------|-----------|-------------------------|
| Rme1p  | [15]      | Indirect: ARR (WT/TFmt) |
| Rox1p  | [15]      | Indirect: ARR (WT/TFmt) |
|        | [35]      | Indirect: ARR (WT/TFmt) |
| Rpn4p  | [36]      | Indirect: ARR (WT/TFmt) |
| Sfl1p  | [37]      | Indirect: ARR (WT/TFmt) |
| Skn7p  | [38]      | Direct: ChIP-CH         |
|        | [15]      | Indirect: ARR (WT/TFmt) |
| Sko1p  | [22]      | Direct: ChIP            |
|        | [39]      | Direct: ChIP            |
| Sok2p  | [40]      | Direct: ChIP-CH         |
|        | [41]      | Indirect: ARR (WT/TFmt) |
|        | [15]      | Indirect: ARR (WT/TFmt) |
|        | [42]      | Indirect: ARR (WT/TFmt) |
| Ste12p | [41]      | Direct: ChIP-CH         |
| Stp2p  | [15]      | Indirect: ARR (WT/TFmt) |
| Tec1p  | [41]      | Direct: ChIP-CH         |
| Yap1p  | [15]      | Indirect: ARR (WT/TFmt) |
|        | [28]      | Indirect: ARR (WT/TFmt) |

Analysis of transcription factors found with Funcassociate 2.0 (<http://lama.mshri.on.ca/funcassociate/>) shows as enriched GO terms (adjusted p-value\* < 0.05): nitrogen compound metabolic process (< 0.001), ion binding (< 0.001), nucleic acid metabolism (< 0.001), stimulus response (0.009), glucose metabolism regulation (0.03) and nutrient response (0.035).

\* In Funcassociate 2.0, p-value is the result of single hypothesis one-sided of the association between attribute and query (based on Fisher's exact test) and adjusted p-value is the fraction (as a %) of 1000 null-hypothesis simulations having attributes with this single-hypothesis p-value or smaller.

B. Transcriptional factors (TF), using YEASTRACT, which presents consensus binding motif in the sequence of the *SPH* promoter. The position in the sequence relative to the transcription start (ATG) is indicated, as well as its orientation (forward in black and reverse in red). TF which have been demonstrated as *SPH* regulators, by direct or indirect evidence (see A), are underlined.

| TF             | Position and orientation                 |
|----------------|------------------------------------------|
| Ash1p          | -296, -65, -909, -565, -14               |
| Azf1p          | -197                                     |
| Cbf1p          | -888                                     |
| <u>Crz1p</u>   | -358                                     |
| Fkh1/2p        | -561, -812, -766, -333                   |
| Gcr1p          | -268, -150, -488, -212                   |
| <u>Gis1p</u>   | -368, -260, -253                         |
| Gln3p          | -303                                     |
| Hac1p          | -134                                     |
| <u>Hsf1p</u>   | -187, -177                               |
| <u>Mcm1p</u>   | -311, -290, -168, -278, -372             |
| Mot3p          | -306, -978                               |
| <u>Msn2/4p</u> | -373, -265, -258                         |
| Nrg1p          | -872, -700, -264, -257, -155, -373       |
| Pho4p          | -889                                     |
| Pip2p          | -366                                     |
| Rph1p          | -373, -265, -258                         |
| Rtg1/3p        | -575                                     |
| <u>Skp1p</u>   | -708                                     |
| Stb5p          | -565, -497, -366, -105, -879, -547, -322 |
| <u>Ste12p</u>  | -993                                     |
| <u>Tec1p</u>   | -207                                     |
| Xbp1p          | -928, -868, -361, -184, -922             |
| <u>Yap1p</u>   | -9, -834                                 |
| Yap3           | -9                                       |
| Yrr1p          | -561                                     |

Analysis of transcription factors found with Funcassociate 2.0 shows as enriched GO terms (adjusted p-value < 0.05): nitrogen compound metabolic process (< 0.001), ion binding (< 0.001), nucleic acid metabolism (< 0.001), filamentous growth (0.005) and stress transcriptional response (0.008). Note that the most over-represented categories (adjusted p-value < 0.001) were found in both tables.

## SUPPLEMENTARY REFERENCES

1. Thomas, B.J. and Rothstein, R. The genetic control of direct-repeat recombination in *Saccharomyces*: the effect of *rad52* and *rad1* on mitotic recombination at *GAL10*, a transcriptionally regulated gene. **Genetics** 123 (1989) 725-738.
2. Estruch, F. and Carlson, M. Two homologous zinc finger genes identified by multicopy suppression in a *SNF1* protein kinase mutant of *Saccharomyces cerevisiae*. **Mol. Cell. Biol.** 13 (1993) 3872-3881.
3. Cunningham, K.W. and Fink, G.R. Calcineurin-dependent growth control in *Saccharomyces cerevisiae* mutants lacking *PMCI*, a homolog of plasma membrane Ca<sup>2+</sup> ATPases. **J. Cell Biol.** 124 (1994) 351-363.
4. Matheos, D.P., Kingsbury, T.J., Ahsan, U.S. and Cunningham, K.W. Tcn1p/Crz1p, a calcineurin-dependent transcription factor that differentially regulates gene expression in *Saccharomyces cerevisiae*. **Genes Dev.** 11 (1997) 3445-3458.
5. Queralt, E. and Igual, J.C. Functional connection between the Clb5 cyclin, the protein kinase C pathway and the Swi4 transcription factor in *Saccharomyces cerevisiae*. **Genetics** 171 (2005) 1485-1498.
6. Igual, J.C., Johnson, A.L. and Johnston, L.H. Coordinated regulation of gene expression by the cell cycle transcription factor Swi4 and the protein kinase C MAP kinase pathway for yeast cell integrity. **EMBO J.** 15 (1996) 5001-5013.
7. Estruch, F. and Carlson, M. Increased dosage of the *MSN1* gene restores invertase expression in yeast mutants defective in the *SNF1* protein kinase. **Nucleic Acids Res.** 18 (1990) 6959-6964.
8. Alepuz, P.M., Matheos, D., Cunningham, K.W. and Estruch, F. The *Saccharomyces cerevisiae* RanGTP-binding protein *msn5p* is involved in different signal transduction pathways. **Genetics** 153 (1999) 1219-1231.
9. Alepuz, P.M., Cunningham, K.W. and Estruch, F. Glucose repression affects ion homeostasis in yeast through the regulation of the stress-activated *ENAI* gene. **Mol. Microbiol.** 26 (1997) 91-98.
10. Pan, X. and Heitman, J. Sok2 regulates yeast pseudohyphal differentiation via a transcription factor cascade that regulates cell-cell adhesion. **Mol. Cell. Biol.** 20 (2000) 8364-8372.
11. Hill, J.E., Myers, A.M., Koerner, T.J. and Tzagoloff, A. Yeast/*E. coli* shuttle vectors with multiple unique restriction sites. **Yeast** 2 (1986) 163- 167.
12. Gray, J.V., Ogas, J.P., Kamada, Y., Stone, M., Levin, D.E. and Herskowitz, I. A role for the Pkc1 MAP kinase pathway of *Saccharomyces cerevisiae* in bud emergence and identification of a putative upstream regulator. **EMBO J.** 16 (1997) 4924-4937.
13. Myers, A.M., Tzagoloff, A., Kinney, D.M. and Lusty, C.J. Yeast shuttle and integrative vectors with multiple cloning sites suitable for construction of *lacZ* fusions. **Gene** 45 (1986) 299-310.

14. Cardona, F., Aranda, A. and del Olmo, M. Ubiquitin ligase Rsp5p is involved in the gene expression changes during nutrient limitation in *Saccharomyces cerevisiae*. **Yeast** 26 (2009) 1-15.
15. Chua, G., Morris, Q.D., Sopko, R., Robinson, M.D., Ryan, O., Chan, E.T., Frey, B.J., Andrews, B.J., Boone, C. and Hughes, T.R. Identifying transcription factor functions and targets by phenotypic activation. **Proc. Natl. Acad. Sci. USA** 103 (2006) 12045-12050.
16. Pagani, M.A., Casamayor, A., Serrano, R., Atrian, S. and Arino, J. Disruption of iron homeostasis in *Saccharomyces cerevisiae* by high zinc levels: a genome-wide study. **Mol. Microbiol.** 65 (2007) 521-537.
17. Venters, B.J. and Pugh, B.F. A canonical promoter organization of the transcription machinery and its regulators in the *Saccharomyces* genome. **Genome Res.** 19 (2009) 360-371.
18. Viladevall, L., Serrano, R., Ruiz, A., Domenech, G., Giraldo, J., Barcelo, A. and Arino, J. Characterization of the calcium-mediated response to alkaline stress in *Saccharomyces cerevisiae*. **J. Biol. Chem.** 279 (2004) 43614-43624.
19. Fendt, S.M., Buescher, J.M., Rudroff, F., Picotti, P., Zamboni, N. and Sauer, U. Tradeoff between enzyme and metabolite efficiency maintains metabolic homeostasis upon perturbations in enzyme capacity. **Mol. Syst. Biol.** 6 (2010) 356.
20. Simoes, T., Mira, N.P., Fernandes, A.R. and Sa-Correia, I. The *SPII* gene, encoding a glycosylphosphatidylinositol-anchored cell wall protein, plays a prominent role in the development of yeast resistance to lipophilic weak-acid food preservatives. **Appl. Environ. Microbiol.** 72 (2006) 7168-7175.
21. Raghevendran, V., Patil, K.R., Olsson, L. and Nielsen, J. Hap4 is not essential for activation of respiration at low specific growth rates in *Saccharomyces cerevisiae*. **J. Biol. Chem.** 281 (2006) 12308-12314.
22. Capaldi, A.P., Kaplan, T., Liu, Y., Habib, N., Regev, A., Friedman, N. and O'Shea, E.K. Structure and function of a transcriptional network activated by the MAPK Hog1. **Nat. Genet.** 40 (2008) 1300-1306.
23. Eastmond, D.L. and Nelson, H.C. Genome-wide analysis reveals new roles for the activation domains of the *Saccharomyces cerevisiae* heat shock transcription factor (Hsf1) during the transient heat shock response. **J. Biol. Chem.** 281 (2006) 32909-32921.
24. Imazu, H. and Sakurai, H. *Saccharomyces cerevisiae* heat shock transcription factor regulates cell wall remodeling in response to heat shock. **Eukaryot. Cell** 4 (2005) 1050-1056.
25. Yamamoto, A., Mizukami, Y. and Sakurai, H. Identification of a novel class of target genes and a novel type of binding sequence of heat shock transcription factor in *Saccharomyces cerevisiae*. **J. Biol. Chem.** 280 (2005) 11911-11919.
26. Santiago, T.C. and Mamoun, C.B. Genome expression analysis in yeast reveals novel transcriptional regulation by inositol and choline and new

- regulatory functions for Opi1p, Ino2p, and Ino4p. **J. Biol. Chem.** 278 (2003) 38723-38730.
27. Abraham, D.S. and Vershon, A.K. N-terminal arm of Mcm1 is required for transcription of a subset of genes involved in maintenance of the cell wall. **Eukaryot. Cell** 4 (2005) 1808-1819.
  28. Thorsen, M., Lagniel, G., Kristiansson, E., Junot, C., Nerman, O., Labarre, J. and Tamas, M.J. Quantitative transcriptome, proteome, and sulfur metabolite profiling of the *Saccharomyces cerevisiae* response to arsenite. **Physiol. Genomics** 30 (2007) 35-43.
  29. Causton, H.C., Ren, B., Koh, S.S., Harbison, C.T., Kanin, E., Jennings, E.G., Lee, T.I., True, H.L., Lander, E.S. and Young, R.A. Remodeling of yeast genome expression in response to environmental changes. **Mol. Biol. Cell.** 12 (2001) 323-337.
  30. Puig, S. and Perez-Ortin, J.E. Stress response and expression patterns in wine fermentations of yeast genes induced at the diauxic shift. **Yeast** 16 (2000) 139-148.
  31. Rep, M., Krantz, M., Thevelein, J.M. and Hohmann, S. The transcriptional response of *Saccharomyces cerevisiae* to osmotic shock. Hot1p and Msn2p/Msn4p are required for the induction of subsets of high osmolarity glycerol pathway-dependent genes. **J. Biol. Chem.** 275 (2000) 8290-8300.
  32. Schuller, C., Mammun, Y.M., Mollapour, M., Krapf, G., Schuster, M., Bauer, B.E., Piper, P.W. and Kuchler, K. Global phenotypic analysis and transcriptional profiling defines the weak acid stress response regulon in *Saccharomyces cerevisiae*. **Mol. Biol. Cell** 15 (2004) 706-720.
  33. Onda, M., Ota, K., Chiba, T., Sakaki, Y. and Ito, T. Analysis of gene network regulating yeast multidrug resistance by artificial activation of transcription factors: involvement of Pdr3 in salt tolerance. **Gene** 332 (2004) 51-59.
  34. Soontorngun, N., Larochelle, M., Drouin, S., Robert, F. and Turcotte, B. Regulation of gluconeogenesis in *Saccharomyces cerevisiae* is mediated by activator and repressor functions of Rds2. **Mol. Cell. Biol.** 27 (2007) 7895-7905.
  35. Ter Linde, J.J. and Steensma, H.Y. A microarray-assisted screen for potential Hap1 and Rox1 target genes in *Saccharomyces cerevisiae*. **Yeast** 19 (2002) 825-840.
  36. Salin, H., Fardeau, V., Piccini, E., Lelandais, G., Tanty, V., Lemoine, S., Jacq, C. and Devaux, F. Structure and properties of transcriptional networks driving selenite stress response in yeasts. **BMC Genomics** 9 (2008) 333.
  37. Galeote, V.A., Alexandre, H., Bach, B., Delobel, P., Dequin, S. and Blondin, B. Sfl1p acts as an activator of the *HSP30* gene in *Saccharomyces cerevisiae*. **Curr. Genet.** 52 (2007) 55-63.
  38. Harrison, J.C., Zyla, T.R., Bardes, E.S. and Lew, D.J. Stress-specific activation mechanisms for the "cell integrity" MAPK pathway. **J. Biol. Chem.** 279 (2004) 2616-2622.

39. Ni, L., Bruce, C., Hart, C., Leigh-Bell, J., Gelperin, D., Umansky, L., Gerstein, M.B. and Snyder, M. Dynamic and complex transcription factor binding during an inducible response in yeast. **Genes Dev.** 23 (2009) 1351-1363.
40. Borneman, A.R., Leigh-Bell, J.A., Yu, H., Bertone, P., Gerstein, M. and Snyder, M. Target hub proteins serve as master regulators of development in yeast. **Genes Dev.** 20 (2006) 435-448.
41. Borneman, A.R., Zhang, Z.D., Rozowsky, J., Seringhaus, M.R., Gerstein, M. and Snyder, M. Transcription factor binding site identification in yeast: a comparison of high-density oligonucleotide and PCR-based microarray platforms. **Funct. Integr. Genomics** 7 (2007) 335-345.
42. Vachova, L., Devaux, F., Kucerova, H., Rivicova, M., Jacq, C. and Palkova, Z. Sok2p transcription factor is involved in adaptive program relevant for long term survival of *Saccharomyces cerevisiae* colonies. **J. Biol. Chem.** 279 (2004) 37973-37981.
